# Supplementary material
Source: Springer Nature journal article supplement (https://www.springermedizin.de/resource/supplementary/12911_2009_283_MOESM7_ESM.pdf/9527536)

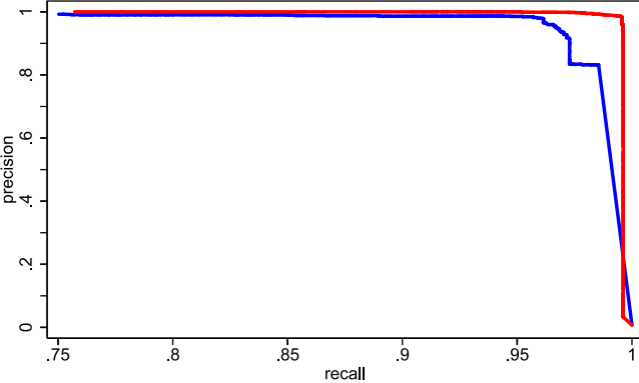

phonetic encoding

Bloom filter

Supplement: MOESM7 [file 9527536]
